# Supplementary material for: A systematic review and meta-analysis of diagnostic performance and physicians’ perceptions of artificial intelligence (AI)-assisted CT diagnostic technology for the classification of pulmonary nodules
Source: PubMed Central journal article supplement — J Thorac Dis. 2021 Aug;13(8):4797–811. doi: 10.21037/jtd-21-810 (PMC8411165; doi:10.21037/jtd-21-810), 2021-08
Supplement: jtd-13-08-4797-supplementary.pdf [file jtd-13-08-4797-supplementary.pdf]

## Appendix 1 Questionnaire items

| No.                                                                                                                       | Items                                                                                                                                                                                                                                                                                                                                                                                                                                                                                                                                                                                                       |
|---------------------------------------------------------------------------------------------------------------------------|-------------------------------------------------------------------------------------------------------------------------------------------------------------------------------------------------------------------------------------------------------------------------------------------------------------------------------------------------------------------------------------------------------------------------------------------------------------------------------------------------------------------------------------------------------------------------------------------------------------|
| <b>Respondents' characteristics</b>                                                                                       |                                                                                                                                                                                                                                                                                                                                                                                                                                                                                                                                                                                                             |
| 1                                                                                                                         | The hospital that you work for: _____                                                                                                                                                                                                                                                                                                                                                                                                                                                                                                                                                                       |
| 2                                                                                                                         | Your working department: _____                                                                                                                                                                                                                                                                                                                                                                                                                                                                                                                                                                              |
| 3                                                                                                                         | Sex: <input type="checkbox"/> Male <input type="checkbox"/> Female                                                                                                                                                                                                                                                                                                                                                                                                                                                                                                                                          |
| 4                                                                                                                         | Age: _____ (years)                                                                                                                                                                                                                                                                                                                                                                                                                                                                                                                                                                                          |
| 5                                                                                                                         | Educational level: <input type="checkbox"/> PhD <input type="checkbox"/> Master's degree <input type="checkbox"/> Bachelor's degree<br><input type="checkbox"/> College diploma <input type="checkbox"/> Others                                                                                                                                                                                                                                                                                                                                                                                             |
| 6                                                                                                                         | Type of employees: <input type="checkbox"/> Physician <input type="checkbox"/> Manager <input type="checkbox"/> Others                                                                                                                                                                                                                                                                                                                                                                                                                                                                                      |
| 7                                                                                                                         | Working years: <input type="checkbox"/> <5 <input type="checkbox"/> 5- <input type="checkbox"/> 10- <input type="checkbox"/> 15- <input type="checkbox"/> 20-                                                                                                                                                                                                                                                                                                                                                                                                                                               |
| <b>Perceptions of AI-assisted CT diagnostic technology for classification of pulmonary nodules as benign or malignant</b> |                                                                                                                                                                                                                                                                                                                                                                                                                                                                                                                                                                                                             |
| 8                                                                                                                         | Do you know about AI-assisted CT diagnostic technology for pulmonary nodules?<br><input type="checkbox"/> No<br><input type="checkbox"/> Yes, but without practical experience<br><input type="checkbox"/> Yes, with experience in clinical research<br><input type="checkbox"/> Yes, with experience in clinical practice                                                                                                                                                                                                                                                                                  |
| 9                                                                                                                         | What do you think the main benefits of AI-assisted CT diagnostic technology for pulmonary nodules (Check the top three)?<br><input type="checkbox"/> High diagnostic accuracy<br><input type="checkbox"/> Improved diagnostic efficiency<br><input type="checkbox"/> Reduced diagnostic expense<br><input type="checkbox"/> Improved patient satisfaction<br><input type="checkbox"/> Reduced workload of radiologists<br><input type="checkbox"/> Reduced number of radiologists<br><input type="checkbox"/> Others                                                                                        |
| 10                                                                                                                        | What do you think the main risks of AI-assisted CT diagnostic technology for pulmonary nodules (Check the top three)?<br><input type="checkbox"/> Leakage of patient privacy<br><input type="checkbox"/> Increased risk of misdiagnosis<br><input type="checkbox"/> Increased risk of missed diagnosis<br><input type="checkbox"/> Increased diagnostic expense<br><input type="checkbox"/> Reduced diagnostic competence of radiologists<br><input type="checkbox"/> Lack of unified diagnostic standard<br><input type="checkbox"/> Increased workload of radiologists<br><input type="checkbox"/> Others |
| 11                                                                                                                        | Do you support the clinical application of AI-assisted CT diagnostic technology for pulmonary nodules?<br><input type="checkbox"/> Strongly supported<br><input type="checkbox"/> Somewhat supported<br><input type="checkbox"/> Neutral<br><input type="checkbox"/> Somewhat unsupported<br><input type="checkbox"/> Strongly unsupported                                                                                                                                                                                                                                                                  |

## Appendix 2 Study Characteristics

| Characteristics                              | No. | Percent (%) | Characteristic                 | No. | Percent (%) |
|----------------------------------------------|-----|-------------|--------------------------------|-----|-------------|
| Year of publication                          |     |             | Data source                    |     |             |
| 2010                                         | 3   | 10.71       | Hospital                       | 9   | 32.14       |
| 2011                                         | 1   | 3.57        | LIDC-IDRI dataset <sup>†</sup> | 7   | 25.00       |
| 2012                                         | 4   | 14.29       | Hospital and LIDC-IDRI         | 3   | 10.71       |
| 2013                                         | 3   | 10.71       | Others                         | 9   | 32.14       |
| 2014                                         | 2   | 7.14        | Total                          | 28  | 100.00      |
| 2015                                         | 2   | 7.14        | Algorithms                     |     |             |
| 2016                                         | 2   | 7.14        | Support vector machine         | 15  | 29.41       |
| 2017                                         | 3   | 10.71       | Deep belief network            | 8   | 15.69       |
| 2018                                         | 7   | 25.00       | Decision tree                  | 7   | 13.73       |
| 2019                                         | 1   | 3.57        | Convolutional neural network   | 5   | 9.80        |
| Total                                        | 28  | 100.00      | Artificial neural network      | 3   | 5.88        |
| Countries where the first author was from    |     |             | Bayesian network               | 2   | 3.92        |
| China                                        | 20  | 71.43       | Fuzzy C-means                  | 2   | 3.92        |
| USA                                          | 4   | 14.29       | Others                         | 9   | 17.65       |
| Turkey                                       | 2   | 7.14        | Total                          | 51  | 100.00      |
| Others                                       | 2   | 7.14        |                                |     |             |
| Total                                        | 28  | 100.00      |                                |     |             |
| Golden criterion                             |     |             |                                |     |             |
| Diagnosis according to the LIDC-IDRI dataset | 7   | 25.00       |                                |     |             |
| Pathologic diagnosis                         | 6   | 21.43       |                                |     |             |
| Pathologic diagnosis or follow-up            | 6   | 21.43       |                                |     |             |
| Radiologist' diagnosis                       | 6   | 21.43       |                                |     |             |
| Others                                       | 3   | 10.71       |                                |     |             |
| Total                                        | 28  | 100.00      |                                |     |             |

<sup>†</sup>LIDC-IDRI dataset: the dataset of the Lung Image Database Consortium (LIDC) of the Image Database Resource Initiative (IDRI).

**Appendix 3** Basic information of the included studies

| Study                                | Algorithms                                                             | N    | TP   | FP  | FN  | TN   | Sensitivity (%) | Specificity (%) | Accuracy (%) |
|--------------------------------------|------------------------------------------------------------------------|------|------|-----|-----|------|-----------------|-----------------|--------------|
| Di., 2010 (1)                        | a. BP neural network                                                   | 193  | 121  | 32  | 23  | 17   | a. 84.03        | a. 34.69        | a. 71.50     |
|                                      | b. Support vector machine                                              | 193  | 94   | 10  | 50  | 39   | b. 65.28        | b. 79.59        | b. 68.91     |
| El-Baz <i>et al.</i> , 2010 (2)      | Bayes                                                                  | 55   | 24   | 0   | 2   | 29   | 92.31           | 100.00          | 96.36        |
| Liu <i>et al.</i> , 2010 (3)         | Not reported                                                           | 48   | 23   | 3   | 1   | 21   | 95.83           | 87.50           | 91.67        |
| El-Baz <i>et al.</i> , 2011 (4)      | K-nearest                                                              | 327  | 143  | 11  | 10  | 163  | 93.46           | 93.68           | 93.58        |
| Chang., 2012 (5)                     | Support vector machine (testing dataset 1)                             | 16   | 9    | 2   | 3   | 2    | 75.00           | 50.00           | 68.75        |
|                                      | Support vector machine (testing dataset 2)                             | 15   | 10   | 1   | 1   | 3    | 90.91           | 75.00           | 86.67        |
|                                      | Support vector machine (testing dataset 3)                             | 16   | 7    | 1   | 5   | 3    | 58.33           | 75.00           | 62.50        |
|                                      | Support vector machine (testing dataset 4)                             | 15   | 8    | 2   | 3   | 2    | 72.73           | 50.00           | 66.67        |
|                                      | Support vector machine (testing dataset 5)                             | 31   | 20   | 3   | 3   | 5    | 86.96           | 62.50           | 80.65        |
|                                      | Support vector machine (testing dataset 6)                             | 31   | 19   | 3   | 4   | 5    | 82.61           | 62.50           | 77.42        |
| He <i>et al.</i> , 2012 (6)          | Support vector machine                                                 | 500  | 250  | 4   | 8   | 238  | 96.90           | 98.35           | 97.60        |
| Liu., 2012 (7)                       | Fuzzy pattern recognition                                              | 10   | 5    | 1   | 1   | 3    | 83.33           | 75.00           | 80.00        |
| Luo., 2012 (8)                       | Least squares support vector machine                                   | 20   | 7    | 1   | 3   | 9    | 70.00           | 90.00           | 80.00        |
| Dilger., 2013 (9)                    | Artificial neural network                                              | 27   | 10   | 2   | 0   | 15   | 100.00          | 88.24           | 92.59        |
| Gu., 2013 (10)                       | Discrimination method of large log-likelihood                          | 100  | 40   | 10  | 10  | 40   | 80.00           | 80.00           | 80.00        |
| Zhang <i>et al.</i> , 2013 (11)      | a. Decision tree (C4.5)                                                | 40   | 15   | 5   | 6   | 14   | a.71.43         | a. 73.68        | a. 72.50     |
|                                      | b. Bayesian network                                                    | 40   | 16   | 4   | 5   | 15   | b.76.19         | b. 78.95        | b. 77.50     |
|                                      | c. Support vector machine                                              | 40   | 17   | 3   | 4   | 16   | c.80.95         | c. 84.21        | c. 82.50     |
| Dandil <i>et al.</i> , 2014 (12)     | Artificial neural network                                              | 64   | 24   | 4   | 2   | 34   | 92.31           | 89.47           | 90.63        |
| Li., 2014 (13)                       | a. Fuzzy C-Means                                                       | 132  | 60   | 21  | 12  | 39   | a.83.33         | a. 65.00        | a. 75.00     |
|                                      | b. Automatically weighted fuzzy C mean clustering                      | 132  | 63   | 9   | 9   | 51   | b.87.50         | b. 85.00        | b. 86.36     |
| Dilger., 2015 (14)                   | a. Artificial neural network                                           | 50   | 20   | 2   | 2   | 26   | a.90.91         | a. 92.86        | a. 92.00     |
|                                      | b. Linear discriminant analysis                                        | 50   | 17   | 3   | 5   | 25   | b.77.27         | b. 89.29        | b. 84.00     |
| Zhang <i>et al.</i> , 2015 (15)      | Not reported                                                           | 60   | 25   | 4   | 5   | 26   | 83.33           | 86.67           | 85.00        |
| Manikandan <i>et al.</i> , 2016 (16) | Support vector machine                                                 | 257  | 22   | 16  | 0   | 219  | 100.00          | 93.19           | 93.77        |
| Wang <i>et al.</i> , 2016 (17)       | Support vector machine                                                 | 193  | 91   | 15  | 31  | 56   | 74.59           | 78.87           | 76.17        |
| da Silva <i>et al.</i> , 2017 (18)   | Convolutional neural network                                           | 200  | 98   | 9   | 2   | 91   | 98.00           | 91.00           | 94.50        |
| Wei., 2017 (19)                      | Deep belief network                                                    | 210  | 85   | 8   | 5   | 112  | 94.44           | 93.33           | 93.81        |
| Yang., 2017 (20)                     | Deep belief network (testing dataset 1)                                | 200  | 98   | 2   | 3   | 97   | 97.03           | 97.98           | 97.50        |
|                                      | Deep belief network (testing dataset 2)                                | 200  | 99   | 1   | 2   | 98   | 98.02           | 98.99           | 98.50        |
|                                      | Deep belief network (testing dataset 3)                                | 200  | 96   | 4   | 4   | 96   | 96.00           | 96.00           | 96.00        |
|                                      | Deep belief network (testing dataset 4)                                | 200  | 97   | 3   | 2   | 98   | 97.98           | 97.03           | 97.50        |
|                                      | Deep belief network (testing dataset 5)                                | 200  | 98   | 2   | 3   | 97   | 97.03           | 97.98           | 97.50        |
|                                      | Deep belief network (testing dataset 6)                                | 200  | 98   | 2   | 3   | 97   | 97.03           | 97.98           | 97.50        |
| Dong., 2018 (21)                     | Support vector machine                                                 | 1500 | 765  | 36  | 50  | 649  | 93.87           | 94.74           | 94.27        |
| Dandil <i>et al.</i> , 2018 (22)     | Probabilistic neural network                                           | 220  | 113  | 6   | 3   | 98   | 97.41           | 94.23           | 95.91        |
| Guan., 2018 (23)                     | Convolutional neural network                                           | 200  | 94   | 9   | 6   | 91   | 94.00           | 91.00           | 92.50        |
| Li <i>et al.</i> , 2018 (24)         | Random forest (testing dataset 1)                                      | 100  | 17   | 13  | 3   | 67   | 85.00           | 83.75           | 84.00        |
|                                      | Random forest (testing dataset 2)                                      | 200  | 62   | 22  | 8   | 108  | 88.57           | 83.08           | 85.00        |
|                                      | Random forest (testing dataset 3)                                      | 300  | 52   | 22  | 6   | 220  | 89.66           | 90.91           | 90.67        |
|                                      | Random forest (testing dataset 4)                                      | 400  | 120  | 16  | 16  | 248  | 88.24           | 93.94           | 92.00        |
|                                      | Random forest (testing dataset 5)                                      | 500  | 147  | 31  | 13  | 309  | 91.88           | 90.88           | 91.20        |
|                                      | Random forest (testing dataset 6)                                      | 600  | 184  | 40  | 16  | 360  | 92.00           | 90.00           | 90.67        |
| Liu <i>et al.</i> , 2018 (25)        | a. Support vector machine based on texture features                    | 150  | 39   | 30  | 36  | 45   | a. 52.00        | a. 60.00        | a. 56.00     |
|                                      | b. Support vector machine based on multi-resolution histogram features | 150  | 69   | 21  | 6   | 54   | b. 92.00        | b. 72.00        | b. 82.00     |
|                                      | c. Deep belief network                                                 | 150  | 72   | 18  | 3   | 57   | c. 96.00        | c. 76.00        | c. 86.00     |
| Yang, K.Q., 2018 (26)                | Convolutional neural network and residual neural network               | 220  | 130  | 24  | 10  | 56   | 92.86           | 70.00           | 84.55        |
| Yang, F., 2018 (27)                  | Convolutional neural network                                           | 91   | 40   | 6   | 4   | 41   | 90.91           | 87.23           | 89.01        |
| Ren <i>et al.</i> , 2019 (28)        | a. Manifold regularized classification deep neural network             | 245  | 70   | 8   | 16  | 151  | a. 81.40        | a. 94.97        | a. 90.20     |
|                                      | b. Classification deep neural network                                  | 245  | 54   | 10  | 32  | 149  | b. 62.79        | b. 93.71        | b. 82.86     |
| All                                  |                                                                        | 9646 | 4009 | 515 | 460 | 4662 | 89.71           | 90.05           | 89.89        |

TP: true positive; FP: false positive; FN: false negative; TN: true negative.

## References

1. Di X. Research on Diagnosis Model of Solitary Pulmonary Nodules Based on CT Images. Thesis, Harbin University. 2010. Available online: <https://kns.cnki.net/kcms/detail/detail.aspx?dbcode=CMFD&dbname=CMFD2012&filename=1011041689.nh&v=iNpYzu%25mmd2B6p5k1h%25mmd2F1x%25mmd2B1%25mmd2BnuRcJIVpBuOibmYidYeURjPCOCeHbYKxSZD7etLXHdaL7>.
2. El-Baz A, Gimel'farb G, Falk R, et al. Appearance analysis for diagnosing malignant lung nodules. In Proceedings of the 2010 IEEE International Symposium on Biomedical Imaging: From Nano to Macro, Rotterdam, Netherlands, 2010; 193-6. doi: 10.1109/ISBI.2010.5490380.
3. Liu Z. The diagnostic value of MSCT LungCARE software for solitary pulmonary nodules. Guizhou Medical Journal 2010;34:539-42.
4. El-Baz A, Nitzken M, Elnakib A, et al. 3D shape analysis for early diagnosis of malignant lung nodules. Med Image Comput Comput Assist Interv 2011;14:175-82.
5. Chang S. Identification of benign and malignant pulmonary nodule based on 3D space. Thesis, Beijing Jiaotong University. 2012. Available online: <http://cdmd.cnki.com.cn/Article/CDMD-10004-1012356698.htm>.
6. He J, Liang P, Y. Luo Y, et al. A diagnosis model design of SPN during MSCT scanning based on neural network. Clinical Medical Engineering 2012;19:497-9.
7. Liu H. Analysis of X-ray Chest Radiographs Based on Fuzzy Theory. Thesis, Zhongbei University. 2012. Available online: <https://d.wanfangdata.com.cn/thesis/D316201>.
8. Luo K. Researched on the Feature Extraction and SVM Classifier in the CT Images. Thesis, Xihua University. 2012. Available online: <https://d.wanfangdata.com.cn/thesis/ChJUaGVzaXNOZXdTmJyMTAzMDISCFkyMTEzMjE0Ggg4eGd5eG1qdQ%3D%3D>.
9. Dilger SKN. The use of surrounding lung parenchyma for the automated classification of pulmonary nodules. Thesis, University of Iowa. 2013. Available online: <https://ir.uiowa.edu/cgi/viewcontent.cgi?article=4603&context=etd>.
10. Gu Y. Comparative study of routine morphology CT perfusion and computer aided diagnosis to solitary pulmonary nodule and mass. Thesis, Xuzhou Medical College. 2013. Available online: <https://d.wanfangdata.com.cn/thesis/ChJUaGVzaXNOZXdTmJyMTAzMDISCFkyNDM1MzAwGghhemJ3emE2NQ%3D%3D>.
11. Zhang J, Xia X, Li P, et al. The diagnosis of solitary pulmonary nodule by computer-aided diagnosis in CT. Journal Med Imaging 2013;9:1386-90.
12. Dandil E, Çakıroğlu M, Ekşi Z, et al. Artificial neural network-based classification system for lung nodules on computed tomography scans, International Conference of Soft Computing and Pattern Recognition 2014;382-6. doi: 10.1109/SOCPAR.2014.7008037.
13. Li J. The discrimination system of solitary pulmonary nodules on CT images. Thesis, Hebei University. 2014. Available online: <https://d.wanfangdata.com.cn/thesis/ChJUaGVzaXNOZXdTmJyMTAzMDISB0Q1MzAwMTcaCGdsbGNsZHo0>.
14. Dilger SNK, Uthoff J, Judisch A, et al. Improved pulmonary nodule classification utilizing quantitative lung parenchyma features. J Med Imaging (Bellingham) 2015;2:041004.
15. Zhang Z, Zhang C, Wang G, et al. The computered-aided diagnosis of solitary pulmonary nodule based on HDCT. J Med Imaging 2015;25:993-7.
16. Manikandan T, Bharathi N. Lung cancer detection using fuzzy auto-seed cluster means morphological segmentation and SVM classifier. J Med Syst 2016;40:181.
17. Wang J, Liu X, Dong D, et al. Prediction of malignant and benign of lung tumor using a quantitative radiomic method. In Proceedings of the 2016 38th Annual International Conference of the IEEE Engineering in Medicine and Biology Society (EMBC), Orlando, FL, USA, 2016; 1272-5. doi: 10.1109/EMBC.2016.7590938.
18. da Silva GLF, da Silva NOP, Silva AC, et al. Lung nodules diagnosis based on evolutionary convolutional neural network. Multimed Tools Appl 2017;76:19039-55.
19. Wei B. Lung ROI feature extraction and selection for classification of benign and malignant nodules based on radiomics. Thesis, Hebei University. 2017. Available online: <https://d.wanfangdata.com.cn/thesis/ChJUaGVzaXNOZXdTmJyMTAzMDISCUQwMTI4NzI1NB0Id202amlkZ3Y%3D>.
20. Yang J. Research on classification of lung nodules based on deep belief network. Thesis, Taiyuan University. 2017. Available online: <https://d.wanfangdata.com.cn/thesis/ChJUaGVzaXNOZXdTmJyMTAzMDISCUQwMTIyODYwMBoIazh2dHNlenE%3D>.
21. Dong L. Research of benign and malignant diagnosis methods for pulmonary nodules based on three dimensional space. Thesis, Tai-yuan University. 2018. Available online: <https://d.wanfangdata.com.cn/thesis/ChJUaGVzaXNOZXdTmJyMTAzMDISCUQwMTQ0NzQ3NxoIeG8xOWRtbG0%3D>.
22. Dandil E. A computer-aided pipeline for automatic lung cancer classification on computed tomography scans. J Healthc Eng 2018;2018:1-12.

23. Guan S. Research and application of end-to-end machine learning models in diagnosis of lung nodules. Thesis, Taiyuan University. 2018. Available online: <https://d.wanfangdata.com.cn/thesis/ChJUaGVzaXNOZZdTMjAyMTAzMDISCUQwMTQ0NzQ4MhoIdTJmNXhuZHA%3D>.
24. Li X, Li B, Tian L, et al. Automatic benign and malignant classification of pulmonary nodules in thoracic computed tomography based on RF algorithm. *Iet Image Processing* 2018;12:1253-64.
25. Liu L, Yang P, Sun W, et al. DBN classifier for classification of benign and malignant solitary pulmonary nodule. *Journal of Harbin University of Science and Technology* 2018;22:9-15.
26. Yang K. A study on differential diagnosis of benign and malignant pulmonary nodules based on deep learning algorithm. Thesis, Zunyi Medical College. 2018. Available online: <https://d.wanfangdata.com.cn/thesis/ChJUaGVzaXNOZZdTMjAyMTAzMDISCUQwMTQ4NzQ1NxoIZDZVqM2hobWI%3D>.
27. Yang F. Research on lung nodule classification algorithm based on convolutional neural network. Thesis, Taiyuan University. 2018. Available online: <https://d.wanfangdata.com.cn/thesis/ChJUaGVzaXNOZZdTMjAyMTAzMDISCUQwMTQ0NzQ4NxoIb2hpbjF4cHI%3D>.
28. Ren Y, Tsai MY, Chen L, et al. A manifold learning regularization approach to enhance 3D CT image-based lung nodule classification. *Int J Comput Assist Radiol Surg* 2019;15:287-95.

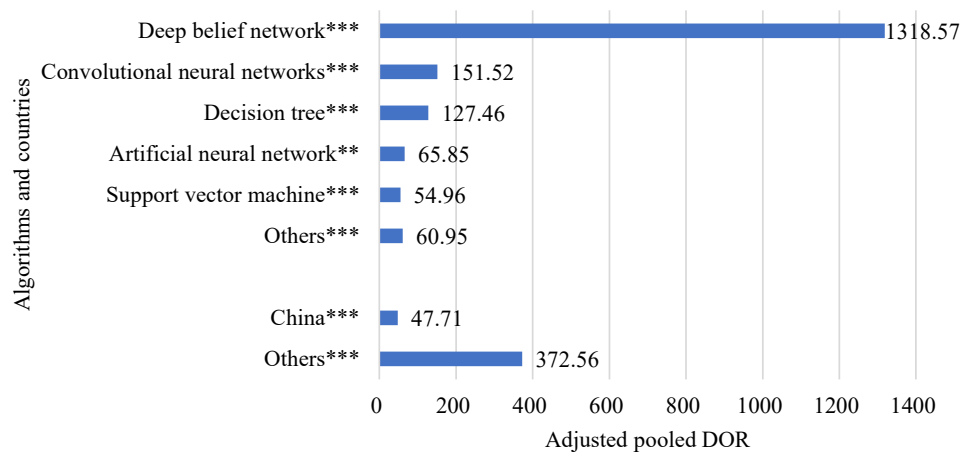

**Figure S1** Adjusted pooled diagnostic odds ratio of AI-assisted CT diagnostic technology for pulmonary nodules†. †A multilevel linear regression model (method=REML, weight=1/variance of odds) was used to control for a study random effect and other fixed effects (number of nodules and algorithms or countries). “\*\*\*” and “\*\*” indicate that the adjusted pooled DOR for the group was significantly higher than 1, with  $P < 0.01$  and with  $P < 0.001$ , respectively.

**Appendix 4** Characteristics of the physicians who were surveyed

| Characteristic           | No. | Percent (%) | Characteristic                       | No. | Percent (%) |
|--------------------------|-----|-------------|--------------------------------------|-----|-------------|
| <b>Region</b>            |     |             | <b>Sex</b>                           |     |             |
| Shanghai                 | 112 | 32.46       | Male                                 | 170 | 49.28       |
| Hubei province           | 134 | 38.84       | Female                               | 175 | 50.72       |
| Gansu province           | 99  | 28.70       | Total                                | 345 | 100.00      |
| Total                    | 345 | 100.00      | <b>Educational level</b>             |     |             |
| <b>Hospital type</b>     |     |             | PhD                                  | 94  | 27.25       |
| General hospitals        | 239 | 69.28       | Master's degree                      | 181 | 52.46       |
| Specialty hospitals      | 106 | 30.72       | Bachelor's degree or college diploma | 70  | 20.29       |
| Total                    | 345 | 100.00      | Total                                | 345 | 100.00      |
| <b>Department</b>        |     |             | <b>Type of employees</b>             |     |             |
| Oncology department      | 174 | 50.43       | Physicians                           | 288 | 83.48       |
| Imaging department       | 111 | 32.17       | Managers                             | 57  | 16.52       |
| Others                   | 60  | 17.39       | Total                                | 345 | 100.00      |
| Total                    | 345 | 100.00      | <b>Experiences with AI-assisted</b>  |     |             |
| <b>Age group (years)</b> |     |             | CT diagnostic technology             |     |             |
| 20-                      | 72  | 20.87       | for pulmonary nodules                |     |             |
| 30-                      | 162 | 46.96       | Had experience                       | 72  | 20.87       |
| 40-                      | 67  | 19.42       | Did not have experience              | 273 | 79.13       |
| 50-                      | 44  | 12.75       | Total                                | 345 | 100.00      |
| Total                    | 345 | 100.00      |                                      |     |             |
